# Supplementary material for: From dioxime oxalates to dihydropyrroles and phenanthridines via iminyl radicals
Source: Royal Society of Chemistry journal article supplement (doi:10.1039/b808625g), 2008-01-01

## Electronic Supplementary Information

### From dioxime oxalates to dihydropyrroles and phenanthridines via iminyl radicals

F. Portela-Cubillo, E. M. Scanlan, J. S. Scott and J. C. Walton

*University of St. Andrews, School of Chemistry, St. Andrews, Fife, KY16 9ST, UK*

**Acetone *O,O'*-oxalyldioxime (1a).**<sup>1</sup> To a stirred solution of oxalyl chloride (1.27 g; 10 mmol) in ether (10 cm<sup>3</sup>) at -40 °C was added a solution of acetone oxime (1.46 g; 20 mmol). The mixture was stirred at -40 °C for 20 min and then at rt for 1 hr. After this time the solvent was removed to give the dioxime oxalate as a colourless solid (1.62 g; 81 %). The product was recrystallised from DCM/pentane at -20 °C to give the dioxime oxalate as colourless prisms, mp 58 – 62 °C (lit<sup>1</sup> = 66 -67 °C);  $\nu_{\max}(\text{NaCl})/\text{cm}^{-1}$  1716 (C=O); <sup>1</sup>H NMR, (300 MHz, CDCl<sub>3</sub>)  $\delta_{\text{H}}$  2.10, 2.09 (2 x CH<sub>3</sub>);  $\delta_{\text{C}}$  17.4, 21.3 (CH<sub>3</sub>), 156.6, 166.5 (C=O, C=N).

**Benzophenone dioxime oxalate (1b).**<sup>1</sup> Benzophenone oxime (3.9 g, 20 mmol) was dissolved in dry ether (30 cm<sup>3</sup>), and added dropwise to a stirred solution of oxalyl chloride (1.2 g, 10 mmol) in dry ether (20 cm<sup>3</sup>) at -40°C. Once the addition was complete the reaction mixture was stirred at -40 °C for 20 min, and then warmed to room temperature. The reaction was then stirred at room temperature for 2 h. The solvent was removed at reduced pressure and the resultant white residue was recrystallised from dichloromethane and pentane at -20 °C to yield the title compound (2.8 g, 63 %). <sup>1</sup>H NMR (CDCl<sub>3</sub>, 300 MHz):  $\delta_{\text{H}}$  7.2-7.4 (20 H, m, Ph<sub>H</sub>), <sup>13</sup>C NMR (CDCl<sub>3</sub>, 75 MHz):  $\delta_{\text{C}}$  129.9 (ArCH), 129.6 (ArCH), 130.7 (ArCH), 131.9 (ArCH) [C=N and C=O not obs].

**1-(2,4-dimethoxyphenyl)pent-4-en-1-one (2b)** A solution of 1-(1-4-dimethoxyphenyl)ethanone (2 g, 11 mmol) in dry THF (5 cm<sup>3</sup>) was added dropwise over 10 min to a suspension of potassium hydride (0.53 g, 13 mmol) in dry THF (25 cm<sup>3</sup>) at 0°C under N<sub>2</sub>. The yellow suspension was stirred at 23 °C for 30 min and BEt<sub>3</sub> (1M solution in THF, 13 cm<sup>3</sup>, 13 mmol) was added dropwise at 15 °C over 15 min. After stirring the solution at 23 °C for 15 min, allyl bromide (1.99 g, 16.5 mmol) was added dropwise over 10 min and the resulting suspension

was stirred for 4 h at 23 °C and quenched with a 1:1 mixture of 30 % NaOH and 30 % H<sub>2</sub>O<sub>2</sub> (15 cm<sup>3</sup>) at 0 °C over 15 min. The reaction mixture was then diluted with H<sub>2</sub>O (20 cm<sup>3</sup>), the layers were separated and the organic layer diluted with Et<sub>2</sub>O (75 cm<sup>3</sup>) and washed with water (2×30 cm<sup>3</sup>). The combined water layers were extracted with DCM (2×30 cm<sup>3</sup>) and the combined organic layers were dried over Na<sub>2</sub>SO<sub>4</sub> and the solvent was removed under reduced pressure. The isolated product was purified by column chromatography (AcOEt/hexane 5%) to afford **2b** as a colourless oil 77 %; <sup>1</sup>H NMR (400 MHz, CDCl<sub>3</sub>), δ<sub>H</sub> 2.35 (2H, q, *J* = 7.2 Hz, CH<sub>2</sub>), 2.97 (2H, t, *J* = 7.2 Hz, CH<sub>2</sub>), 3.77 (3H, s, CH<sub>3</sub>), 3.81 (3H, s, CH<sub>3</sub>), 4.95 (2H, m, CH<sub>2</sub>), 5.84 (1H, m, CH), 6.37 (1H, d, *J* = 2.3 Hz, CH), 6.44 (1H, dd, *J* = 8.7, 2.3 Hz, CH), 7.73 (1H, d, *J* = 8.7 Hz, CH); <sup>13</sup>C NMR δ<sub>C</sub> 28.7, 43.0 (CH<sub>2</sub>), 55.7 (CH<sub>3</sub>)<sub>x2</sub>, 98.5, 105.2 (CH), 114.7 (CH<sub>2</sub>), 121.4 (C), 133.0 (CH), 138.3 (CH), 160.8, 164.4, 199.6 (C); IR 2942, 1664, 1575 cm<sup>-1</sup>.

**1-(2,4-dimethoxyphenyl)pent-4-en-1-one oxime (3b)**. A suspension of 1-(2,4-dimethoxyphenyl)pent-4-en-1-one (1 g, 4.5 mmol), hydroxylamine hydrochloride (0.62g, 9 mmol) and sodium acetate (0.73, 9 mmol) in EtOH (25 cm<sup>3</sup>) was heated under reflux conditions for 4 h, and the progress of the reaction was followed by TLC (EtOAc/hexane 1:2). Upon completion, the reaction mixture was poured into water (20 cm<sup>3</sup>) and extracted with DCM (3 × 15 cm<sup>3</sup>L). The organic layer was dried over MgSO<sub>4</sub> and concentrated under reduced pressure. The residue was purified by flash column chromatography (EtOAc/hexane 10%) to afford the desired product in 71 % yield. Two isomers 7:3. <sup>1</sup>H NMR (400 MHz, CDCl<sub>3</sub>), δ<sub>H</sub> 2.14 (2H, m, CH<sub>2</sub>), 2.52/2.76 (2H, m, CH<sub>2</sub>), 3.71 (3H, s, CH<sub>3</sub>), 3.73 (3H, s, CH<sub>3</sub>), 4.88 (2H, m, CH<sub>2</sub>), 5.72 (1H, m, CH), 6.35-6.46 (2H, m, CH), 6.98/7.10 (1H, d, *J* = 8.8 Hz, CH); <sup>13</sup>C NMR δ<sub>C</sub> 28.2/30.9, 30.3/34.9 (CH<sub>2</sub>), 55.8/56.0 (CH<sub>3</sub>)<sub>x2</sub>, 99.2/99.3, 104.6/104.8 (CH), 115.1/115.6 (CH<sub>2</sub>), 118.9 (C), 130.2/131.2, 138.0/138.6 (CH), 157.5/158.9, 160.1, 161.7/161.9 (C); IR 3228, 1596, 925 cm<sup>-1</sup>.

**1-(2,4-dimethoxyphenyl)pent-4-en-1-one dioxime oxalate (4b)**. Mixture of 3 isomers; <sup>1</sup>H NMR (400 MHz, CDCl<sub>3</sub>), δ<sub>H</sub> 2.06-2.70 (8H, m, CH<sub>2</sub>), 3.71-3.81 (12H, m, CH<sub>3</sub>), 4.97 (4H, m, CH<sub>2</sub>), 5.77 (2H, m, CH), 6.43 (4H, m, CH), 7.51 (1H, m, CH), 8.16 (1H, m, CH); <sup>13</sup>C NMR δ<sub>C</sub> 27.8/29.6/30.1 (CH<sub>2</sub>)<sub>x2</sub>, 34.4/34.5/37.0 (CH<sub>2</sub>)<sub>x2</sub>, 55.8 (CH<sub>3</sub>)<sub>x4</sub>, 98.6/98.7/99.8 (CH)<sub>x2</sub>, 103.7/104.6/105.2 (CH)<sub>x2</sub>, 115.7 (CH<sub>2</sub>)<sub>x2</sub>, 120.7/129.6/130.5 (CH)<sub>x2</sub>, 121.4 (C)<sub>x2</sub>, 149.1 (C)<sub>x2</sub>, 156.3 (C)<sub>x2</sub>, 161.9 (C)<sub>x2</sub>, 169.9/174.6 (C)<sub>x2</sub>; IR; 2934, 1768, 1705, 1605, 1512 cm<sup>-1</sup>.

**Photolysis of 2,2-dimethyl-1-phenylpent-4-en-1-one dioxime oxalate (4c).** Compound **4c** (24.3 mg, 0.053 mmol) and MAP (1 eq) were dissolved in cyclohexane (2 cm<sup>3</sup>) and the mixture was photolysed for 8 h at 85 °C. Chromatography yielded 3,4-dihydro-2,4,4-trimethyl-5-phenyl-2H-pyrrole **7c** (35 %), <sup>1</sup>H NMR, δ<sub>H</sub> 7.64 – 7.7 (2H, m), 7.14 – 7.4 (3H, m), 4.10 (1H, dp, *J* 6.7, 8.4), 2.11 (2H, dd, *J* 6.7, 12.5), 1.39 (3H, d, *J* 6.9), 1.35 (6H, s); <sup>13</sup>C NMR, δ<sub>C</sub> 129.8 (C), 128.5 (CH), 128.3 (CH), 63.7 (CH), 50.4 (C), 27.9 (CH<sub>3</sub>), 27.1 (CH<sub>2</sub>), 26.3 (CH<sub>3</sub>), 22.6 (CH<sub>3</sub>); *m/z* (%) 187 (100), 131 (60), 84 (80); HRMS; C<sub>13</sub>H<sub>18</sub>N (MH<sup>+</sup>) requires 188.1439; found 188.1432. Similar photolysis in toluene gave **7c** in 47 % yield.

**5-(4-Methoxyphenyl)-2-methyl-3,4-dihydro-2H-pyrrole (7a).** From photolysis of **4a** and MAP in toluene for 4 h at rt. Red oil; 61 %; <sup>1</sup>H NMR (400 MHz, CDCl<sub>3</sub>), δ<sub>H</sub> 1.28 (3H, d, *J* = 6.8, CH<sub>3</sub>), 1.46 (1H, m, CH<sub>2</sub>), 2.15 (1H, m, CH<sub>2</sub>), 2.78 (1H, m, CH<sub>2</sub>), 2.96 (1H, m, CH<sub>2</sub>), 3.78 (3H, s, CH<sub>3</sub>), 4.20 (1H, m, CH), 6.83 (2H, d, *J* = 8.8 Hz, CH), 7.71 (2H, d, *J* = 8.8 Hz, CH); <sup>13</sup>C NMR δ<sub>C</sub> 22.2 (CH<sub>3</sub>), 30.7, 35.2 (CH<sub>2</sub>), 55.6 (CH<sub>3</sub>), 68.2 (CH), 113.8 (CH×2), 127.4 (C), 129.3 (CH×2), 161.2, 171.1 (C); IR 3268, 2923, 1684 cm<sup>-1</sup> HRMS (CI); C<sub>12</sub>H<sub>16</sub>NO requires 190.1232; found 190.1238.

**5-(2,4-Dimethoxyphenyl)-2-methyl-3,4-dihydro-2H-pyrrole (7b).** A solution dioxime oxalate **4b** (400 mg, 0.57 mmol) and MAP (171 mg, 1.14 mmol) in toluene (25 cm<sup>3</sup>) was photolysed for 4 h at rt by light from a 400 W UV lamp. After this time the toluene was evaporated to dryness to give a yellow oil. The oil was purified by column chromatography (10 % EtOAc/hexane) to give **7b** as a red oil 67 %; <sup>1</sup>H NMR (400 MHz, CDCl<sub>3</sub>), δ<sub>H</sub> 1.28 (3H, d, *J* = 6.7 Hz, CH<sub>3</sub>), 1.44 (1H, m, CH<sub>2</sub>), 2.12 (1H, m, CH<sub>2</sub>), 2.88 (1H, m, CH<sub>2</sub>), 3.04 (1H, m, CH<sub>2</sub>), 3.77 (3H, s, CH<sub>3</sub>), 3.78 (3H, s, CH<sub>3</sub>), 4.12 (1H, m, CH), 6.43 (2H, m, CH), 7.68 (1H, d, *J* = 8.5, CH); <sup>13</sup>C NMR δ<sub>C</sub> 21.9 (CH<sub>3</sub>), 30.1, 38.1 (CH<sub>2</sub>), 55.5 (CH<sub>3</sub>×2), 66.4 (CH), 98.6, 105.1 (CH), 116.6 (C), 131.7 (CH), 159.0, 165.8, 172.3 (C); IR 3018, 2964, 1609 cm<sup>-1</sup> HRMS (CI); C<sub>13</sub>H<sub>18</sub>NO<sub>2</sub> requires 220.1338; found: 220.1337.

**2,2-Dimethyl-5-phenyl-3,4-dihydro-2H-pyrrole (7d).**<sup>2</sup> A solution dioxime oxalate **4d** (250 mg, 0.57 mmol) and MAP (1 equiv.) in toluene (15 cm<sup>3</sup>) was photolysed for 4 h at rt by light from a 400 W UV lamp. After this time the toluene was evaporated to dryness to give a yellow oil.

<sup>2</sup> J. Yamamoto, M. Akazome, T. Kondo and T. Mitsudo. *J. Org. Chem.* 1995, **60**, 8328.

Chromatography failed to give pure **7d** but it was clearly visible in the total product mixture (38% from NMR integral);  $^1\text{H}$  NMR (400 MHz,  $\text{CDCl}_3$ ),  $\delta_{\text{H}}$  1.35 (6H, s, 2x  $\text{CH}_3$ ), 1.9-3.0 (4H, m, 2 x  $\text{CH}_2$ ), 7.3-7.6 (5H, m, ArH).

**Benzylidene-3,4-dihydro(2H)pyrrole (9)**. From photolysis (5 h, rt) of **8** (500 mg; 3.6 mmol) and MAP (540 mg; 3.6 mmol) in toluene (400  $\text{cm}^3$ ); yellow oil (84 %).  $^1\text{H}$  NMR and GC-MS showed this to be a mixture of two isomers;  $^1\text{H}$  NMR (300 MHz,  $\text{CDCl}_3$ )  $\delta_{\text{H}}$  2.45-2.75 (4 H, m, 2 x  $\text{CH}_2$ ), 5.57 (1/2 H, dt,  $J$  13.2,  $J$  6.5,  $\text{C}=\text{CHPh}$ ), 6.11 (1/2 H, dt,  $J$  15.9,  $J$  4.9,  $\text{C}=\text{CHPh}$ ), 6.44 (1/2 H, d,  $J$  15.9), 6.52 (1/2 H, d,  $J$  13.2,  $\text{HC}=\text{N}$ ), 7.25-7.40 (5 H, m, PhH);  $\delta_{\text{C}}$  18.0 (2x $\text{CH}_2$ ), 24.8 ( $\text{CH}_2$ ), 29.2 ( $\text{CH}_2$ ), 125.9, 126.7, 127.6, 127.9, 128.1, 128.8, 129.0 (ArCH), 132.6 ( $\text{HC}=\text{N}$ ), 133.4 ( $\text{HC}=\text{C}$ ) [note that several CHs overlapped]. The product was analyzed by GC/MS; *peak no.* 471, *E-* or *Z-9* (54 %), *m/z* (relative intensity); 157 ( $\text{M}^+$ , 22), 117 (100), 102 (6), 91 (27); *peak no.* 502, *E-* or *Z-9* (42 %), *m/z* (relative intensity) 157 ( $\text{M}^+$ , 100), 129 (7), 117 (73); HRMS  $\text{C}_{11}\text{H}_{12}\text{N}$  ( $\text{MH}^+$ ) requires 158.0970; found; 158.0975.

**Methyl 3-(2,4-dimethyl-3,4-dihydro-2H-pyrrol-5-yl)propanoate (12c)**. From benzophenone dioxime oxalate **11c**: yellow oil 61 %;  $^1\text{H}$  NMR (400 MHz,  $\text{CDCl}_3$ ),  $\delta_{\text{H}}$  1.03/1.09 (3H, d,  $J$  = 7.2 Hz,  $\text{CH}_3$ ), 1.10/1.19 (3H, d,  $J$  = 7.2 Hz,  $\text{CH}_3$ ), 1.61 (1H, t,  $J$  = 6.7 Hz,  $\text{CH}_2$ ), 2.22-2.84 (6H, m, CH,  $\text{CH}_2$ ), 3.60 (3H, s,  $\text{CH}_3$ ), 3.77/4.01 (1H, m, CH);  $^{13}\text{C}$  NMR  $\delta_{\text{C}}$  16.4/17.1, 20.7/21.9 ( $\text{CH}_3$ ), 24.9/25.1, 28.7/29.4, 38.5/39.2 ( $\text{CH}_2$ ), 43.4/44.5 (CH), 50.6 ( $\text{CH}_3$ ), 64.3/64.7 (CH), 172.8, 177.2 (C); IR 1764, 1646  $\text{cm}^{-1}$ . Photolyses of dioxime oxalates **11a** and **11b** gave the product in yields of 41% and 58% (Note that **12a**, **12b** and **12c** are the same dihydropyrrole).

**Phenanthridine (18a)**. Yellow crystals; 67 %; mp 105-107 °C;  $^1\text{H}$  NMR<sup>3</sup> (400 MHz,  $\text{CDCl}_3$ ),  $\delta_{\text{H}}$  7.62-4.65 (2H, m, CH), 7.71-7.75 (2H, m, CH), 8.08 (1H, d,  $J$  = 8.1, CH), 8.22 (1H, d,  $J$  = 8.2 Hz, CH), 8.61 (1H, dd,  $J$  = 8.1, 1.2 Hz, CH), 8.65 (1H, d,  $J$  = 8.3, CH), 9.32 (1H, s, CH);  $^{13}\text{C}$  NMR  $\delta_{\text{C}}$  121.7, 122.1 (CH), 123.9, 126.9 (C), 127.3, 128.4, 128.6, 130.0, 130.8 (CH), 132.3, 144.3 (C), 153.4 (CH).

**6-Methylphenanthridine (18b)**. Yellow crystals; 73 %; mp 81-83 °C;  $^1\text{H}$  NMR<sup>2</sup> (400 MHz,  $\text{CDCl}_3$ ),  $\delta_{\text{H}}$  3.02 (3H, s,  $\text{CH}_3$ ), 7.57-7.76 (3H, m, CH), 7.79-7.85 (1H, m, CH), 8.11 (1H, dd,  $J$  = 8.1, 1.1 Hz, CH), 8.19 (1H, d,  $J$  = 8.2 Hz, CH), 8.51 (1H, d,  $J$  = 8.1 Hz, CH), 8.59 (1H, d,  $J$  = 8.1

<sup>3</sup> M. Lysen, J. L. Kristensen, P. Vedsø and M. Begtrup, *Org. Lett.* 2002, **4**, 257-259.

Hz, CH);  $^{13}\text{C}$  NMR  $\delta_{\text{C}}$  23.3 (CH<sub>3</sub>), 122.0, 122.3 (CH), 123.8, 125.9 (C), 126.3, 126.5, 127.3, 128.6, 129.4, 130.5 (CH), 132.5, 143.7, 158.9 (C).

*6-Phenylphenanthridine (18c)*. Yellow crystals; 59 %; mp 104-106 °C;  $^1\text{H}$  NMR<sup>2</sup> (400 MHz, CDCl<sub>3</sub>),  $\delta_{\text{H}}$  7.50-7.80 (8H, m, CH), 7.88 (1H, ddd,  $J = 8.3, 7.0, 1.3$  Hz, CH), 8.11 (1H, dd,  $J = 8.3, 1.3$  Hz, CH), 8.26 (1H, dd,  $J = 8.0, 1.6$  Hz, CH), 8.64 (1H, d,  $J = 8.0$  Hz, CH), 8.72 (1H, d,  $J = 8.3$  Hz, CH);  $^{13}\text{C}$  NMR  $\delta_{\text{C}}$  121.9, 122.2 (CH), 123.7, 125.2 (C), 126.9, 127.1, 128.4, 128.7, 128.8, 128.9 (CH), 129.7 (CH)×2, 130.2 (CH), 130.5 (CH)×2, 133.4, 139.8, 143.8, 161.4 (C).

**[1,3]Dioxolo[4,5-*j*]phenanthridine (trisphaeridine, 18d)**. Yellow solid; 59 %; mp 144-146 °C;  $^1\text{H}$  NMR<sup>4</sup> (400 MHz, CDCl<sub>3</sub>),  $\delta_{\text{H}}$  6.00 (2H, s, CH<sub>2</sub>), 7.33 (1H, s, CH), 7.62 (1H, td,  $J = 7.5, 1.5$ , CH), 7.62 (1H, td,  $J = 7.5, 1.2$  Hz, CH), 7.91 (1H, s, CH), 8.13 (1H, dd,  $J = 7.4, 1.2$  Hz, CH), 8.37 (1H, dd,  $J = 8.4, 1.2$  Hz, CH), 9.08 (1H, s, CH);  $^{13}\text{C}$  NMR  $\delta_{\text{C}}$  99.9 (CH), 101.9 (CH<sub>2</sub>), 105.5, 122.0 (CH), 123.0, 124.3 (C), 126.7, 128.0, 130.0 (CH), 130.3, 144.0, 148.2, 151.5 (C), 151.7 (CH); IR; 1620, 1580, 1498, 1464 cm<sup>-1</sup>; HRMS (CI<sup>+</sup>) C<sub>14</sub>H<sub>10</sub>NO<sub>2</sub> requires 224.0712; found: 224.0712.

**EPR Spectra.** EPR spectra were obtained with a Bruker EMX 10/12 spectrometer operating at 9.5 GHz with 100 kHz modulation. Solutions of freshly prepared dioxime oxalate (ca. 0.1-0.2 M) and 4-methoxyacetophenone (MAP, usually 2 mol equiv.) in *t*-butylbenzene were placed in 0.4 mm o.d. quartz tubes and deaerated by bubbling nitrogen gas for 20 min. Samples were irradiated in the resonant cavity by unfiltered light from a 500 W super pressure Hg arc. In all cases where spectra were obtained, hfs were checked with the aid of computer simulations using the Bruker SimFonia software package. Microwave power 1.0 mW; modulation amplitude 1.0  $G_{pp}$ ,

### Spectra of dimethyl- and diphenyl-iminyls from 1a,b

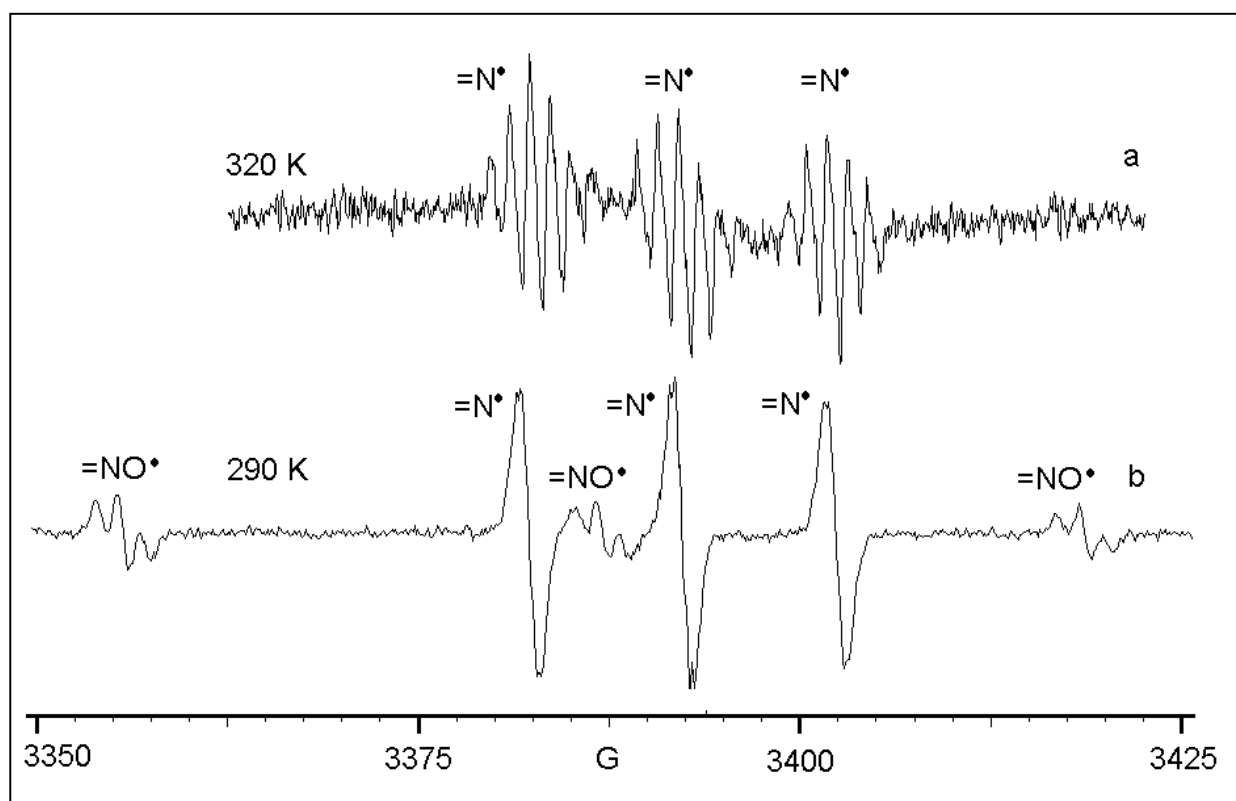

**Upper spectrum (a):** Dimethyliminyl radical ( $Me_2C=N\bullet$ ) obtained from photolysis of dioxime oxalate **1a** with MAP in PhBu-*t* at 320 K.  $g = 2.0034$ ,  $a(N) = 9.8$ ,  $a(6H) = 1.4$  G. Gain  $1.4 \times 10^6$

**Lower spectrum (b):** Photolysis of **1b** at 290 K gave spectrum b containing diphenyliminyl  $Ph_2C=N\bullet$  [ $g = 2.003$ ,  $a(N) = 10.0$  G, denoted by:  $=N\bullet$ ] together with diphenyliminoxyl

$\text{Ph}_2\text{C}=\text{NO}\bullet$  [ $g = 2.006$ ,  $a(\text{N}) = 31.3$ ,  $a(2\text{H}) = 1.4$  G, denoted by:  $=\text{NO}\bullet$ ]. Gain  $5.0 \times 10^5$ . Note the much higher signal/noise ratio of (b) as compared to (a).

### Spectra of biphenyliminyls from 15b and 15c

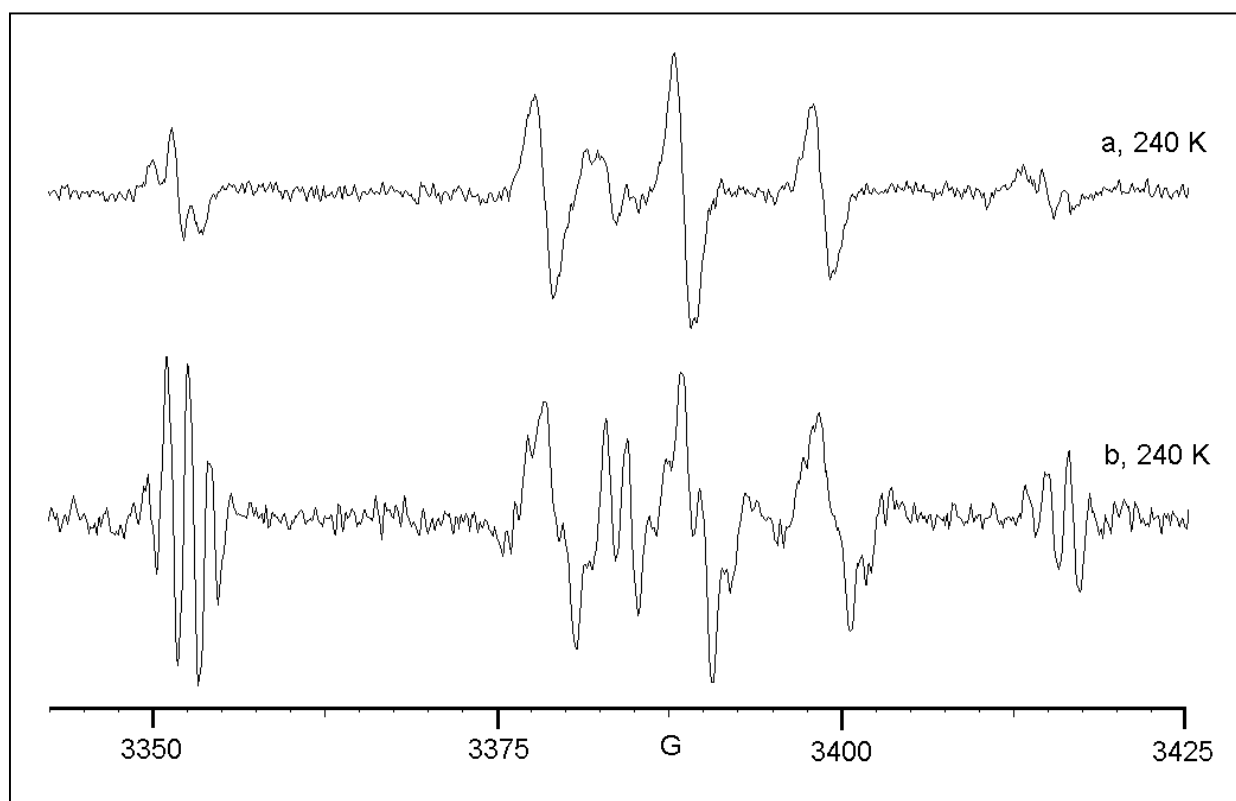

**Upper Spectrum (a):** Photolysis of **15c** at 240 K gave  $\text{BiPhC}(\text{Ph})=\text{N}\bullet$  [ $g = 2.003$ ,  $a(\text{N}) = 10.1$  G] and  $\text{BiPhC}(\text{Ph})=\text{NO}\bullet$  [ $g = 2.006$ ,  $a(\text{N}) = 31.6$ ,  $a(2\text{H}) = 1.5$  G]

**Lower Spectrum (b):** Photolysis of **15b** at 240 K gave  $\text{BiPhC}(\text{Me})=\text{N}\bullet$  [ $g = 2.003$ ,  $a(\text{N}) = 10.0$ ,  $a(3\text{H}) \sim 1.3$  G] and  $\text{BiPhC}(\text{Me})=\text{NO}\bullet$  [ $g = 2.006$ ,  $a(\text{N}) = 31.8$ ,  $a(3\text{H}) = 1.5$  G].

For literature data on these and related iminyl and iminoxyl radicals see: A. R. Forrester and F. A. Neugebauer, in *Landolt-Bornstein, Magnetic Properties of Free Radicals, Vol. II9c1*, eds. H. Fischer and K.-H. Hellwege, Springer-Verlag, Berlin, 1979, p. 115.

## NMR Spectra of Dihydropyrroles

### NMR spectra of 7a

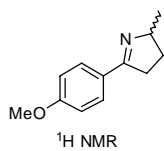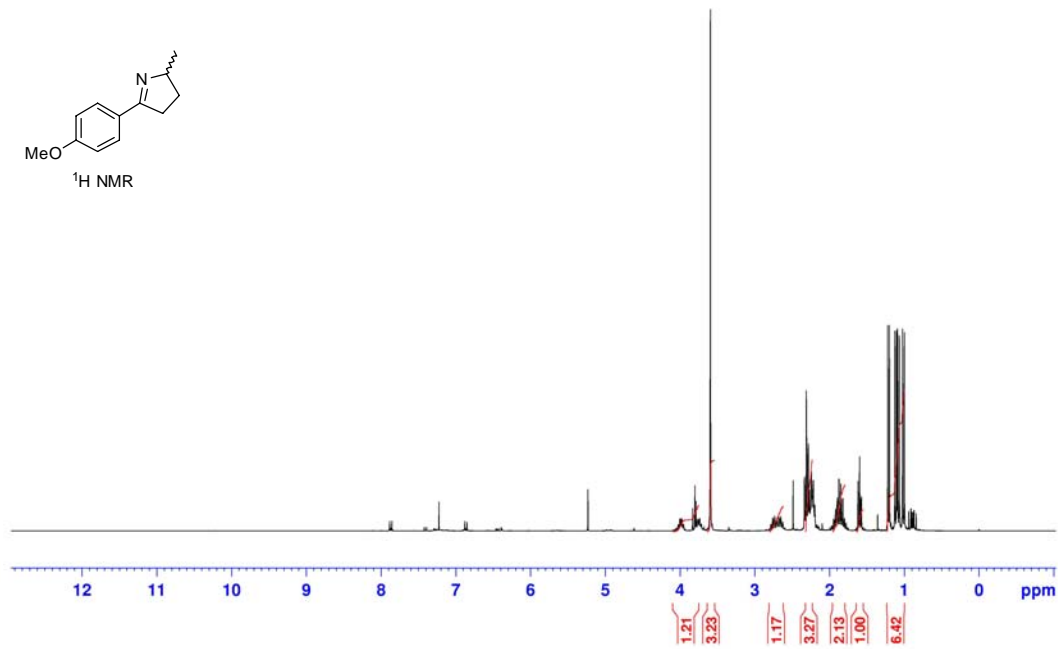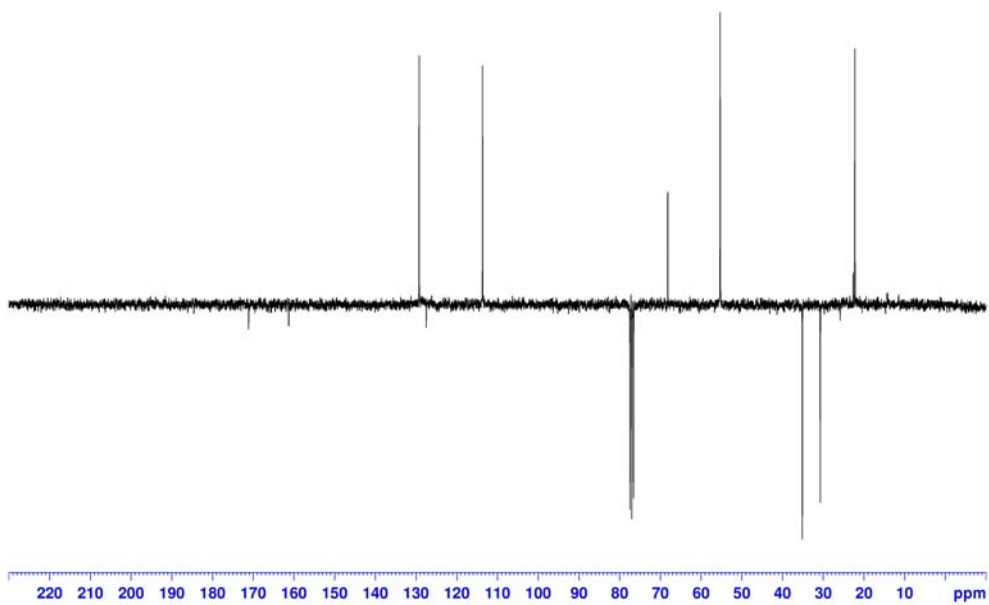



## NMR Spectra of 7b

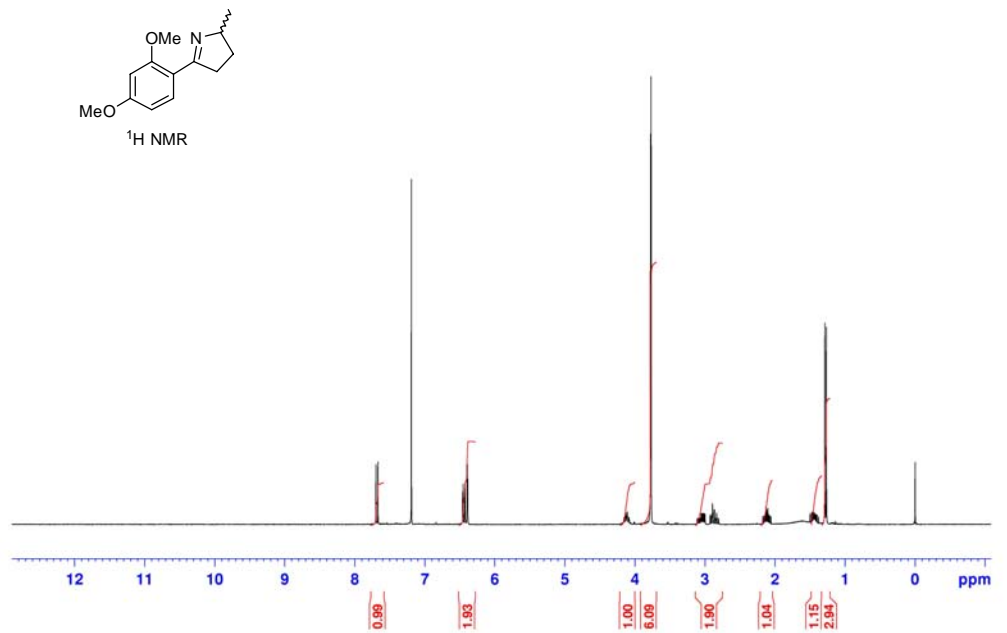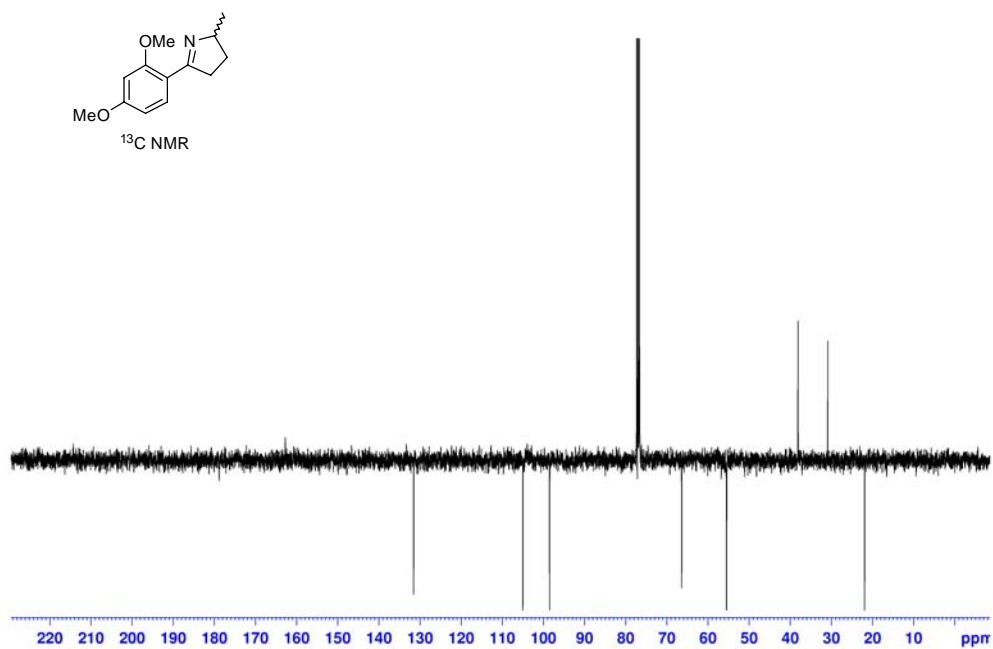

**$^1\text{H}$  NMR spectrum of 9**

2-Benzylidene-3,4-Dihydro-2H-Pyrole

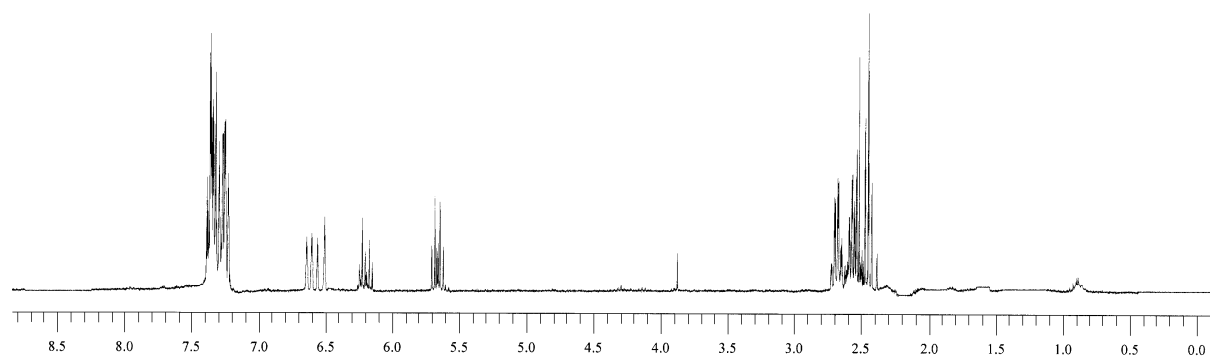

### NMR Spectra of 12a (=12b = 12c)

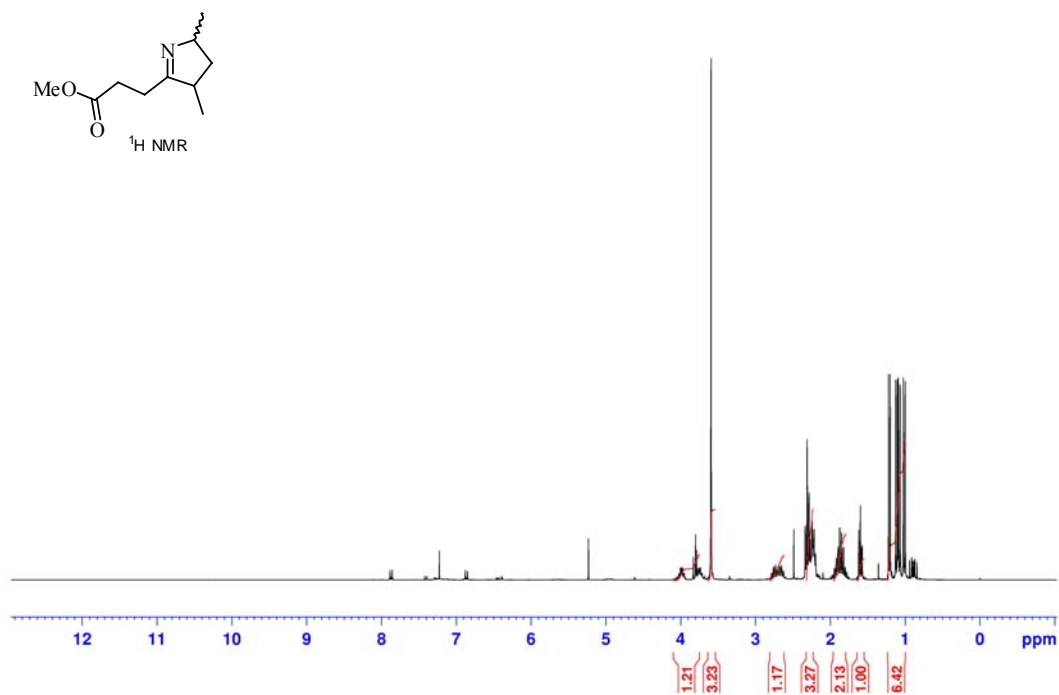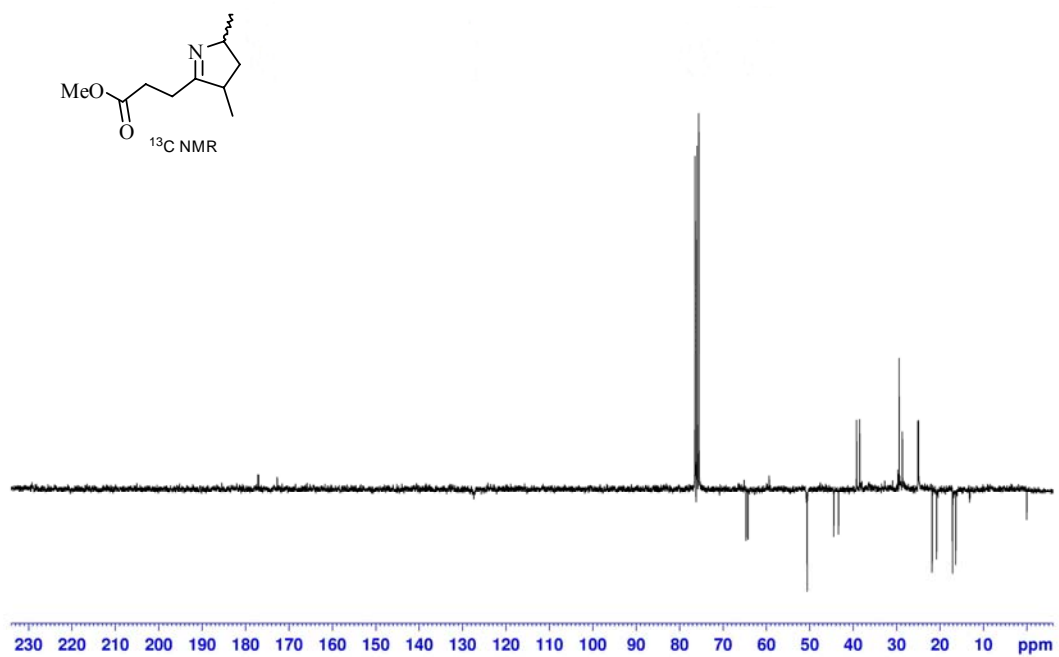

Supplement: b808625g.pdf [file b808625g.pdf]
